# Supplementary material for: Oxidation of europium with ammonium perfluorocarboxylates in liquid ammonia: pathways to europium(ii) carboxylates and hexanuclear europium(iii) fluoridocarboxylate complexes
Source: Royal Society of Chemistry journal article supplement (doi:10.1039/d1dt04204a), 2022-01-01
Supplement: d1dt04204a1.pdf [file d1dt04204a1.pdf]

## Electronic Supportion Information for:

Oxidation of europium with ammonium perfluorocarboxylates  
in liquid ammonia: Pathways to europium(II) carboxylates  
and hexanuclear europium(III) fluoridocarboxylate complexes

*Florian Morsbach,<sup>a</sup> Steffen Klenner,<sup>b</sup> Rainer Pöttgen<sup>b</sup> and Walter Frank<sup>\*a</sup>*

<sup>a</sup> Institut für Anorganische Chemie und Strukturchemie,  
Heinrich-Heine-Universität Düsseldorf, Universitätsstraße 1, D-40225 Düsseldorf, Germany.

<sup>b</sup> Institut für Anorganische und Analytische Chemie,  
Westfälische Wilhelms-Universität, Correnstraße 30, D-48149 Münster, Germany.

\*Correspondence e-mail: wfrank@hhu.de

## Table of contents

|          |                                                                                                                                                                    |           |
|----------|--------------------------------------------------------------------------------------------------------------------------------------------------------------------|-----------|
| <b>1</b> | <b>Equations</b> .....                                                                                                                                             | <b>3</b>  |
| 1.1      | Equations for the synthesis of 1 .....                                                                                                                             | 3         |
| 1.2      | Equations for the synthesis of 2 and 3 .....                                                                                                                       | 3         |
| <b>2</b> | <b>Selected structural parameters</b> .....                                                                                                                        | <b>3</b>  |
| 2.1      | $[\text{Eu}(\text{O}_2\text{CCF}_3)_2(\text{dmf})_2]_\infty$ (1).....                                                                                              | 3         |
| 2.2      | $(\text{NH}_4)_2[\text{Eu}_6\text{F}_8(\text{O}_2\text{CCF}_3)_{12}(\text{CF}_3\text{COOH})_6]$ (2) .....                                                          | 4         |
| 2.3      | $(\text{NH}_4)_2[\text{Eu}_6\text{F}_8(\text{O}_2\text{CC}_2\text{F}_5)_{12}(\text{C}_2\text{F}_5\text{COOH})_6] \cdot 8\text{C}_2\text{F}_5\text{COOH}$ (3) ..... | 5         |
| <b>3</b> | <b>Thermal analysis</b> .....                                                                                                                                      | <b>7</b>  |
| <b>4</b> | <b>Spectroscopy</b> .....                                                                                                                                          | <b>10</b> |
| 4.1      | IR and Raman spectra.....                                                                                                                                          | 11        |
| 4.2      | $^{19}\text{F}$ NMR spectra.....                                                                                                                                   | 15        |
| <b>5</b> | <b>Packing diagrams and crystal morphology</b> .....                                                                                                               | <b>16</b> |
|          | <b>References</b> .....                                                                                                                                            | <b>18</b> |

# 1 Equations

## 1.1 Equations for the synthesis of 1

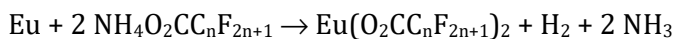

■ **Equation S1** Idealized reaction between europium metal and ammonium perfluorocarboxylates.

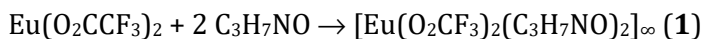

■ **Equation S2** Formation of 1.

## 1.2 Equations for the synthesis of 2 and 3

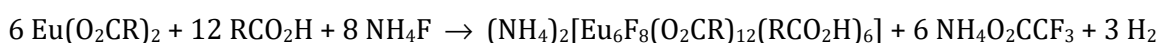

■ **Equation S3** 1<sup>st</sup> assumption for the formation of 2 (R = CF<sub>3</sub>) and 3 (R = C<sub>2</sub>F<sub>5</sub>).

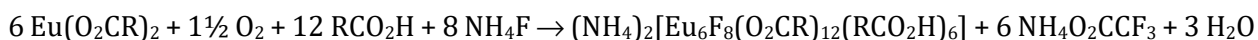

■ **Equation S4** 2<sup>nd</sup> assumption for the formation of 2 (R = CF<sub>3</sub>) and 3 (R = C<sub>2</sub>F<sub>5</sub>).

# 2 Selected structural parameters

## 2.1 [Eu(O<sub>2</sub>CCF<sub>3</sub>)<sub>2</sub>(dmf)<sub>2</sub>]<sub>∞</sub> (1)

■ **Table S1** Selected structural parameters for 1 (Å, °).

| Parameters               | <i>d<sub>i</sub></i> | <i>s<sub>i</sub></i> |
|--------------------------|----------------------|----------------------|
| Bond lengths             |                      |                      |
| Eu1—O4                   | 2.542(6)             | 0.30                 |
| Eu1—O2 <sup>i</sup>      | 2.546(6)             | 0.30                 |
| Eu1—O1                   | 2.562(6)             | 0.29                 |
| Eu1—O3 <sup>ii</sup>     | 2.565(7)             | 0.29                 |
| Eu1—O6 <sup>i</sup>      | 2.598(6)             | 0.26                 |
| Eu1—O6                   | 2.614(6)             | 0.25                 |
| Eu1—O5 <sup>ii</sup>     | 2.621(6)             | 0.25                 |
| Eu1—O5                   | 2.623(6)             | 0.24                 |
| Eu1—O19                  | 2.383(17)            | 0.43                 |
|                          |                      | <i>S</i> 1.92        |
| Eu1…Eu1 <sup>i</sup>     | 4.0839(13)           |                      |
| Eu1…Eu1 <sup>ii</sup>    | 4.1049(13)           |                      |
| Bond angles              |                      |                      |
| O1—C1—O2                 | 130.8(10)            |                      |
| O3—C3—O4                 | 131.7(10)            |                      |
| Eu1—O5—Eu1 <sup>ii</sup> | 103.0(2)             |                      |
| Eu1—O6—Eu1 <sup>i</sup>  | 103.2(2)             |                      |

$$S = \sum s_i = \sum \exp[(d_0 - d_i) \div B];^{[1]} d_0(\text{Eu}^{\text{II}}-\text{O}) = 2.102 \text{ \AA}, B = 0.37.^{[2]}$$

Symmetry codes: (i) 1-x, 1-y, 1-z; (ii) -x, 1-y, 1-z.

2.2  $(\text{NH}_4)_2[\text{Eu}_6\text{F}_8(\text{O}_2\text{CCF}_3)_{12}(\text{CF}_3\text{COOH})_6]$  (**2**)Table S2 Selected structural parameters for **2** (Å).

| Bond lengths  | $d_i$            | $s_i$         | Bond lengths   | $d_i$            | $s_i$         |
|---------------|------------------|---------------|----------------|------------------|---------------|
| Eu1—F1        | 2.400(13)        | 0.31          | Eu4—F2         | 2.426(13)        | 0.28          |
| Eu1—F2        | 2.382(13)        | 0.37          | Eu4—F3         | 2.417(15)        | 0.29          |
| Eu1—F3        | 2.382(13)        | 0.32          | Eu4—F6         | 2.403(12)        | 0.30          |
| Eu1—F4        | 2.406(13)        | 0.30          | Eu4—F7         | 2.390(12)        | 0.31          |
| <b>Eu1—O1</b> | <b>2.751(19)</b> | 0.16          | <b>Eu4—O7</b>  | <b>2.566(17)</b> | 0.27          |
| Eu1—O13       | 2.355(17)        | 0.46          | Eu4—O18        | 2.367(17)        | 0.46          |
| Eu1—O15       | 2.42(2)          | 0.30          | Eu4—O24        | 2.488(16)        | 0.33          |
| Eu1—O17       | 2.497(17)        | 0.32          | Eu4—O25        | 2.385(18)        | 0.43          |
| Eu1—O19       | 2.383(17)        | 0.43          | Eu4—O33        | 2.384(17)        | 0.43          |
|               |                  | <b>S 3.07</b> |                |                  | <b>S 3.11</b> |
| Eu2—F1        | 2.378(13)        | 0.32          | Eu5—F3         | 2.361(14)        | 0.34          |
| Eu2—F4        | 2.377(12)        | 0.33          | Eu5—F4         | 2.368(13)        | 0.33          |
| Eu2—F5        | 2.402(12)        | 0.30          | Eu5—F7         | 2.364(12)        | 0.34          |
| Eu2—F8        | 2.391(11)        | 0.31          | Eu5—F8         | 2.413(14)        | 0.30          |
| <b>Eu2—O3</b> | <b>2.528(17)</b> | 0.29          | <b>Eu5—O9</b>  | <b>2.720(18)</b> | 0.18          |
| Eu2—O14       | 2.388(17)        | 0.43          | Eu5—O20        | 2.454(17)        | 0.36          |
| Eu2—O21       | 2.368(19)        | 0.46          | Eu5—O26        | 2.380(17)        | 0.44          |
| Eu2—O28       | 2.469(17)        | 0.34          | Eu5—O27        | 2.359(18)        | 0.46          |
| Eu2—O29       | 2.373(15)        | 0.44          | Eu5—O35        | 2.412(17)        | 0.40          |
|               |                  | <b>S 3.23</b> |                |                  | <b>S 3.11</b> |
| Eu3—F1        | 2.377(14)        | 0.33          | Eu6—F5         | 2.390(12)        | 0.31          |
| Eu3—F2        | 2.390(13)        | 0.32          | Eu6—F6         | 2.404(13)        | 0.30          |
| Eu3—F5        | 2.380(12)        | 0.32          | Eu6—F7         | 2.399(13)        | 0.31          |
| Eu3—F6        | 2.346(12)        | 0.35          | Eu6—F8         | 2.363(12)        | 0.34          |
| <b>Eu3—O5</b> | <b>2.688(19)</b> | 0.19          | <b>Eu6—O11</b> | <b>2.766(19)</b> | 0.15          |
| Eu3—O16       | 2.406(17)        | 0.41          | Eu6—O30        | 2.502(17)        | 0.32          |
| Eu3—O22       | 2.357(18)        | 0.47          | Eu6—O32        | 2.373(17)        | 0.45          |
| Eu3—O23       | 2.351(18)        | 0.47          | Eu6—O34        | 2.337(18)        | 0.49          |
| Eu3—O31       | 2.439(17)        | 0.37          | Eu6—O36        | 2.431(17)        | 0.38          |
|               |                  | <b>S 3.22</b> |                |                  | <b>S 3.04</b> |

$S = \sum s_i = \sum \exp[(d_0 - d_i) \div B]$ ; <sup>[1]</sup>  $d_0(\text{Eu}^{\text{III}}-\text{F}) = 1.961 \text{ \AA}$ ,  $B = 0.37$ ; <sup>[3]</sup>  $d_0(\text{Eu}^{\text{III}}-\text{O}) = 2.074 \text{ \AA}$ ,  $B = 0.37$ .<sup>[1]</sup>

Eu—O bonds located at the octahedral vertices are set in bold in the table.

Table S3 Hydrogen-bond geometry in **2** (Å, °).

| D—H...A                   | D—H  | H...A | D...A   | D—H...A |
|---------------------------|------|-------|---------|---------|
| N1—H1...O1                | 0.91 | 2.51  | 2.82(3) | 100.5   |
| N1—H3...O13               | 0.91 | 2.17  | 2.85(3) | 131.1   |
| N1—H4...O9 <sup>i</sup>   | 0.91 | 2.11  | 2.91(3) | 146.1   |
| N2—H8...O11               | 0.91 | 2.11  | 2.85(3) | 137.3   |
| N2—H5...O5 <sup>ii</sup>  | 0.91 | 2.06  | 2.89(3) | 150.6   |
| N2—H7...O34               | 0.91 | 2.22  | 2.95(3) | 136.6   |
| N2—H6...O22 <sup>ii</sup> | 0.91 | 2.34  | 3.00(3) | 128.9   |
| O2—H9...O17               | 0.83 | 1.83  | 2.64(2) | 163.6   |
| O12—H14...O30             | 0.83 | 1.84  | 2.65(3) | 164.0   |
| O6—H11...O31              | 0.83 | 1.85  | 2.66(3) | 163.6   |
| O4—H10...O28              | 0.83 | 1.90  | 2.68(3) | 155.9   |
| O10—H13...O20             | 0.83 | 1.90  | 2.68(3) | 155.3   |
| O8—H12...O24              | 0.83 | 1.92  | 2.70(3) | 156.4   |

Symmetry codes: (i)  $x+1, y, z$ ; (ii)  $x-1, y, z$ .

2.3  $(\text{NH}_4)_2[\text{Eu}_6\text{F}_8(\text{O}_2\text{CC}_2\text{F}_5)_{12}(\text{C}_2\text{F}_5\text{COOH})_6] \cdot 8\text{C}_2\text{F}_5\text{COOH}$  (3)

Table S4 Selected structural parameters for 3 (Å).

| Bond lengths  | $d_i$           | $s_i$         | Bond lengths   | $d_i$           | $s_i$         |
|---------------|-----------------|---------------|----------------|-----------------|---------------|
| Eu1—F1        | 2.349(3)        | 0.35          | Eu4—F5         | 2.353(3)        | 0.35          |
| Eu1—F2        | 2.417(3)        | 0.29          | Eu4—F6         | 2.390(3)        | 0.31          |
| Eu1—F5        | 2.370(3)        | 0.33          | Eu4—F7         | 2.372(3)        | 0.33          |
| Eu1—F6        | 2.369(3)        | 0.33          | Eu4—F8         | 2.381(3)        | 0.32          |
| <b>Eu1—O1</b> | <b>2.655(4)</b> | 0.21          | <b>Eu4—O7</b>  | <b>2.657(4)</b> | 0.21          |
| Eu1—O13       | 2.370(4)        | 0.45          | Eu4—O18        | 2.387(4)        | 0.43          |
| Eu1—O15       | 2.462(4)        | 0.35          | Eu4—O26        | 2.367(4)        | 0.45          |
| Eu1—O17       | 2.358(4)        | 0.46          | Eu4—O27        | 2.363(4)        | 0.46          |
| Eu1—O19       | 2.388(4)        | 0.43          | Eu4—O36        | 2.446(4)        | 0.37          |
|               |                 | <b>S 3.20</b> |                |                 | <b>S 3.22</b> |
| Eu2—F1        | 2.391(3)        | 0.31          | Eu5—F2         | 2.344(3)        | 0.36          |
| Eu2—F2        | 2.378(3)        | 0.32          | Eu5—F3         | 2.373(3)        | 0.33          |
| Eu2—F3        | 2.375(3)        | 0.33          | Eu5—F5         | 2.381(3)        | 0.32          |
| Eu2—F4        | 2.376(3)        | 0.33          | Eu5—F8         | 2.358(3)        | 0.34          |
| <b>Eu2—O3</b> | <b>2.701(4)</b> | 0.18          | <b>Eu5—O9</b>  | <b>2.644(4)</b> | 0.21          |
| Eu2—O14       | 2.446(4)        | 0.37          | Eu5—O20        | 2.370(4)        | 0.45          |
| Eu2—O22       | 2.378(4)        | 0.44          | Eu5—O21        | 2.453(4)        | 0.36          |
| Eu2—O23       | 2.365(4)        | 0.46          | Eu5—O28        | 2.380(4)        | 0.44          |
| Eu2—O32       | 2.389(4)        | 0.43          | Eu5—O34        | 2.383(4)        | 0.43          |
|               |                 | <b>S 3.16</b> |                |                 | <b>S 3.24</b> |
| Eu3—F1        | 2.364(3)        | 0.34          | Eu6—F3         | 2.370(3)        | 0.33          |
| Eu3—F4        | 2.365(3)        | 0.34          | Eu6—F4         | 2.377(3)        | 0.32          |
| Eu3—F6        | 2.385(3)        | 0.32          | Eu6—F7         | 2.402(3)        | 0.30          |
| Eu3—F7        | 2.344(3)        | 0.36          | Eu6—F8         | 2.358(3)        | 0.34          |
| <b>Eu3—O5</b> | <b>2.650(4)</b> | 0.21          | <b>Eu6—O11</b> | <b>2.672(4)</b> | 0.20          |
| Eu3—O16       | 2.375(4)        | 0.44          | Eu6—O29        | 2.362(4)        | 0.46          |
| Eu3—O24       | 2.388(4)        | 0.43          | Eu6—O31        | 2.359(4)        | 0.46          |
| Eu3—O25       | 2.494(4)        | 0.32          | Eu6—O33        | 2.424(4)        | 0.39          |
| Eu3—O30       | 2.374(4)        | 0.44          | Eu6—O35        | 2.411(4)        | 0.40          |
|               |                 | <b>S 3.19</b> |                |                 | <b>S 3.21</b> |

$$S = \sum s_i = \sum \exp[(d_0 - d_i) \div B];^{[1]} d_0(\text{Eu}^{\text{III}}-\text{F}) = 1.961 \text{ \AA}, B = 0.37;^{[3]} d_0(\text{Eu}^{\text{III}}-\text{O}) = 2.074 \text{ \AA}, B = 0.37.^{[1]}$$

Eu—O bonds located at the octahedral vertices are set in bold in the table.

**Table S5** Hydrogen-bond geometry in **3** (Å, °).

| D—H...A              | D—H  | H...A | D...A     | D—H...A |
|----------------------|------|-------|-----------|---------|
| N1—H2...O47          | 0.91 | 2.15  | 2.909(8)  | 139.8   |
| N1—H2...O45          | 0.91 | 2.29  | 2.921(8)  | 126.2   |
| N1—H3...O24          | 0.91 | 2.11  | 2.933(6)  | 149.6   |
| N1—H4...O37          | 0.91 | 2.10  | 2.989(7)  | 165.9   |
| N1—H1...O30          | 0.91 | 2.56  | 3.034(6)  | 113.3   |
| N1—H3...O5           | 0.91 | 2.43  | 3.081(7)  | 128.2   |
| N2—H8...O28          | 0.91 | 2.25  | 2.590(7)  | 132.9   |
| N2—H6...O49          | 0.91 | 2.41  | 2.874(8)  | 111.7   |
| N2—H5...O51          | 0.91 | 2.04  | 2.917(8)  | 162.0   |
| N2—H7...O43          | 0.91 | 2.18  | 3.034(7)  | 155.1   |
| N2—H8...O9           | 0.91 | 2.19  | 3.034(7)  | 153.1   |
| Acid molecules, int. |      |       |           |         |
| O4—H10...O14         | 0.84 | 1.91  | 2.669(6)  | 149.9   |
| O6—H11...O25         | 0.84 | 1.87  | 2.680(6)  | 160.8   |
| O10—H13...O21        | 0.84 | 1.92  | 2.723(6)  | 160.1   |
| O2—H9...O15          | 0.84 | 1.92  | 2.725(6)  | 158.9   |
| O8—H12...O36         | 0.84 | 1.92  | 2.727(6)  | 160.7   |
| O12—H14...O33        | 0.84 | 2.28  | 2.863(7)  | 127.2   |
| O12—H14...O35        | 0.84 | 2.25  | 2.904(7)  | 134.5   |
| Acid molecules, ext. |      |       |           |         |
| O44—H18...O41        | 0.84 | 1.77  | 2.577(8)  | 159.6   |
| O38—H15...O39        | 0.84 | 1.78  | 2.613(11) | 171.5   |
| O42—H17...O43        | 0.84 | 1.86  | 2.701(7)  | 179.7   |
| O40—H16...O37        | 0.84 | 1.94  | 2.752(9)  | 163.4   |
| O48—H20...O3         | 0.84 | 2.20  | 2.902(6)  | 140.4   |
| O50—H21...O1         | 0.84 | 2.35  | 2.962(6)  | 130.3   |
| O52—H22...O7         | 0.84 | 2.24  | 2.970(6)  | 145.7   |
| O46—H19...O11        | 0.84 | 2.27  | 3.003(6)  | 146.2   |
| O50—H21...O19        | 0.84 | 2.24  | 3.038(6)  | 157.9   |
| O52—H22...O18        | 0.84 | 2.40  | 3.081(7)  | 136.0   |

### 3 Thermal analysis

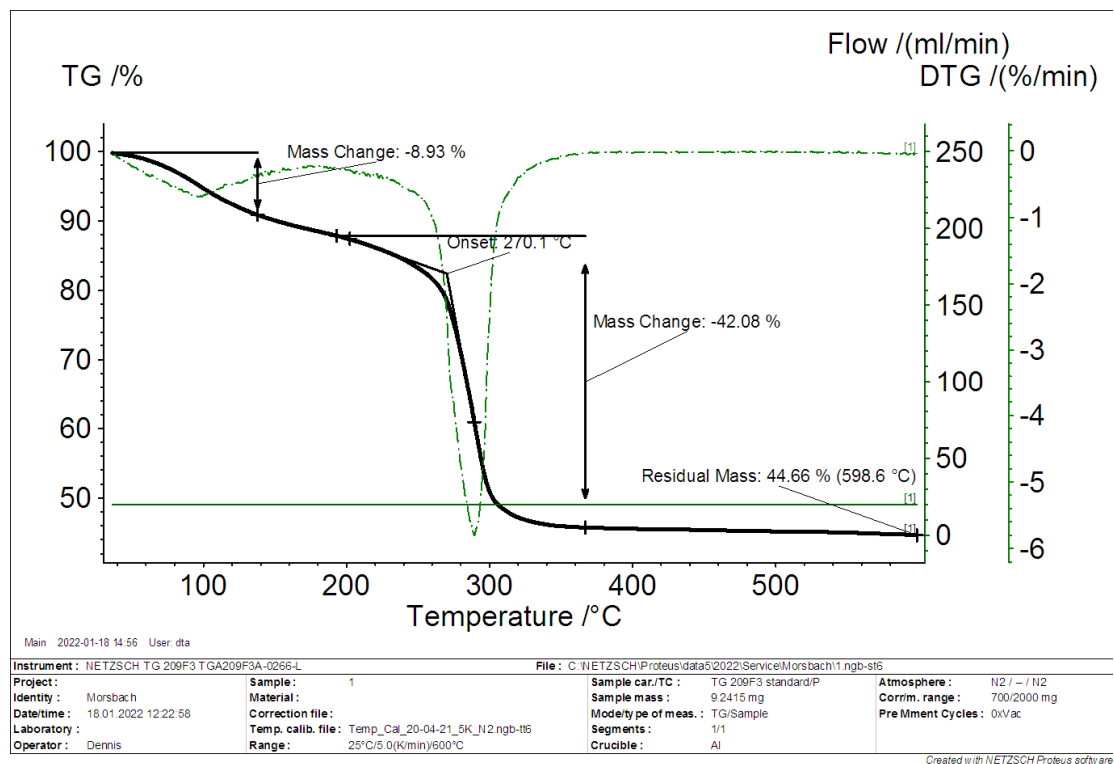

■ Fig. S1 TGA curve of **1**,  $[\text{Eu}(\text{O}_2\text{CCF}_3)_2(\text{dmf})_2]_\infty$ .

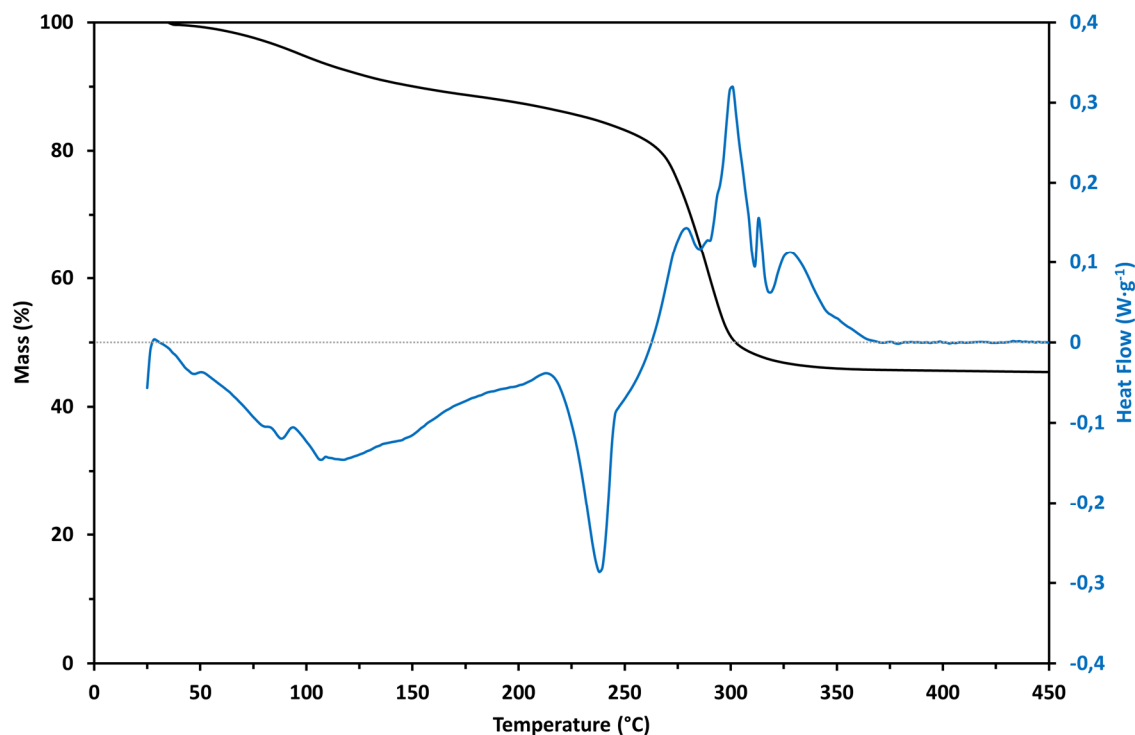

■ Fig. S2 DSC curve of **1**,  $[\text{Eu}(\text{O}_2\text{CCF}_3)_2(\text{dmf})_2]_\infty$ , with overlaid TGA curve.

## Thermal analysis (continued)

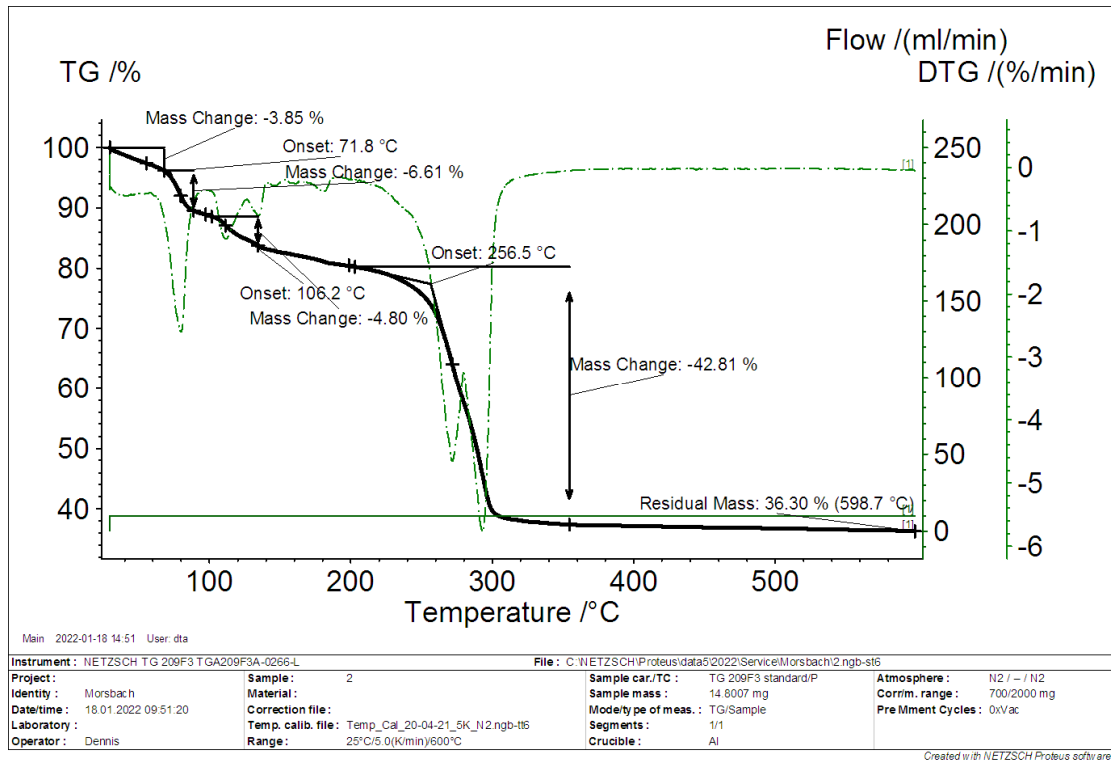

■ Fig. S3 TGA curve of **2**,  $(\text{NH}_4)_2[\text{Eu}_6\text{F}_8(\text{O}_2\text{CCF}_3)_{12}(\text{CF}_3\text{COOH})_6]$ .

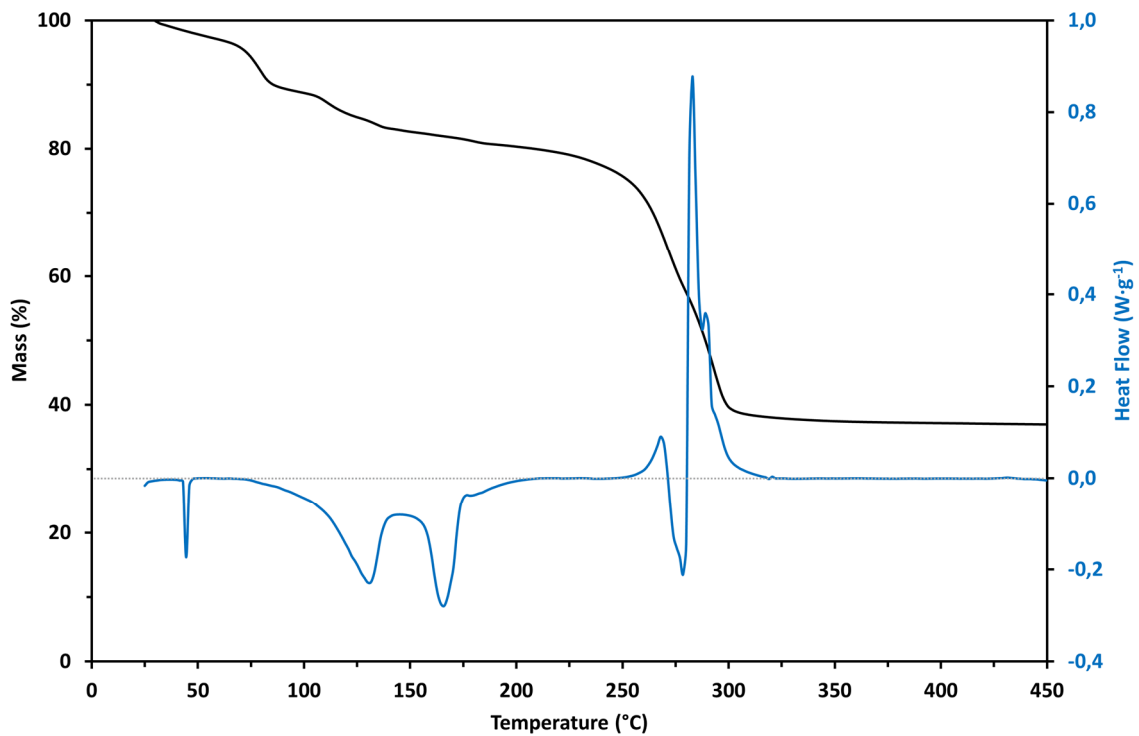

■ Fig. S4 DSC curve of **2**,  $(\text{NH}_4)_2[\text{Eu}_6\text{F}_8(\text{O}_2\text{CCF}_3)_{12}(\text{CF}_3\text{COOH})_6]$ , with overlaid TGA curve.



## Thermal analysis (continued)

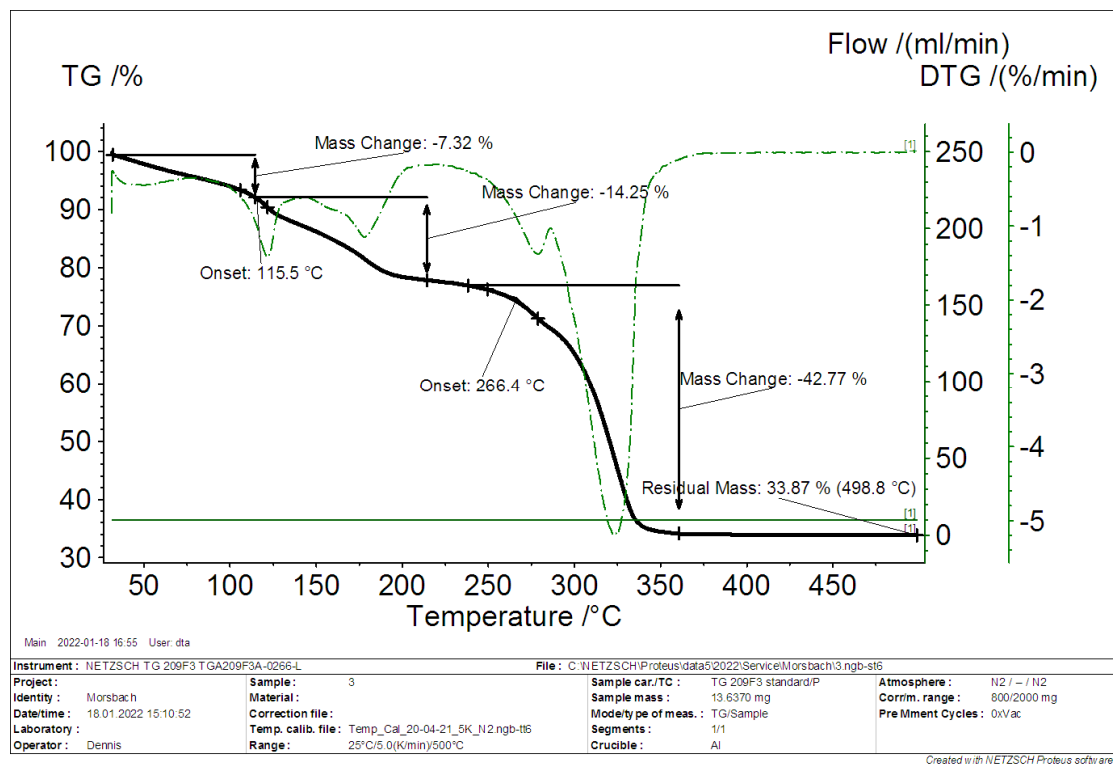

■ Fig. S5 TGA curve of **3** –  $8 \text{ C}_2\text{F}_5\text{COOH}$ ,  $(\text{NH}_4)_2[\text{Eu}_6\text{F}_8(\text{O}_2\text{CCF}_3)_{12}(\text{CF}_3\text{COOH})_6]$ .

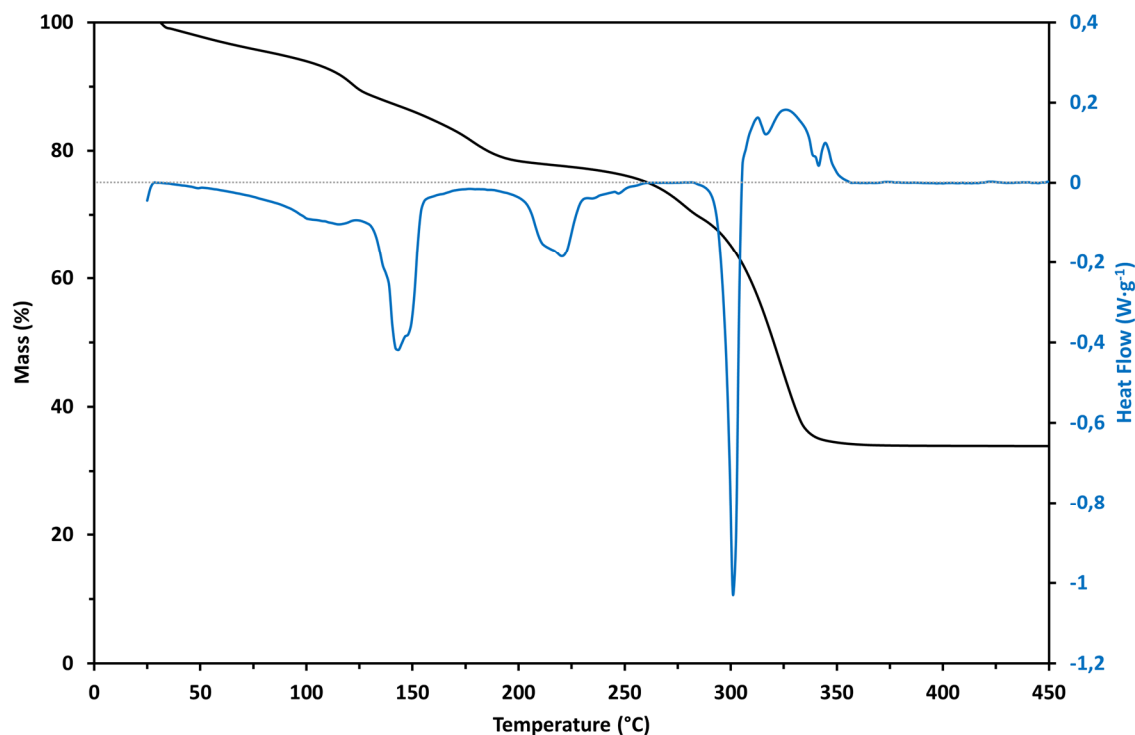

■ Fig. S6 DSC curve of **3** –  $8 \text{ C}_2\text{F}_5\text{COOH}$ ,  $(\text{NH}_4)_2[\text{Eu}_6\text{F}_8(\text{O}_2\text{CC}_2\text{F}_5)_{12}(\text{C}_2\text{F}_5\text{COOH})_6]$ , with overlaid TGA curve.

Thermal analysis (continued)

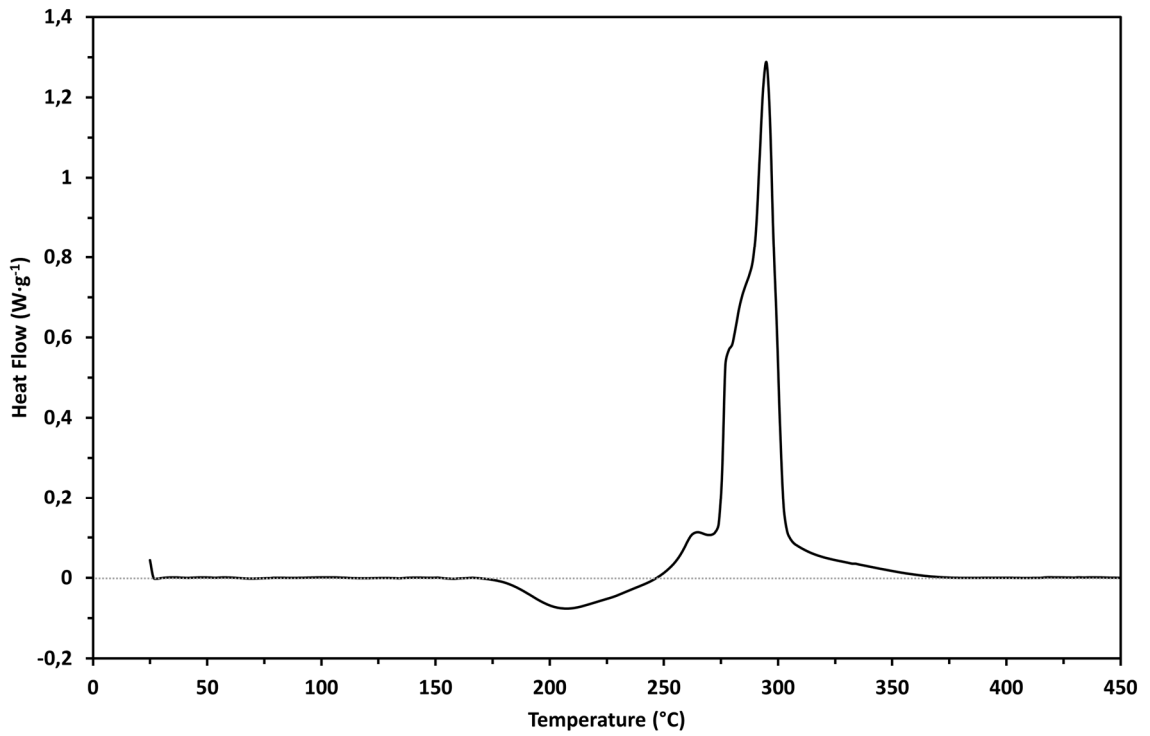

■ Fig. S7 DSC curve of the  $\text{Eu}(\text{O}_2\text{CCF}_3)_2$ -containing substance (precursor for **1** and **2**).

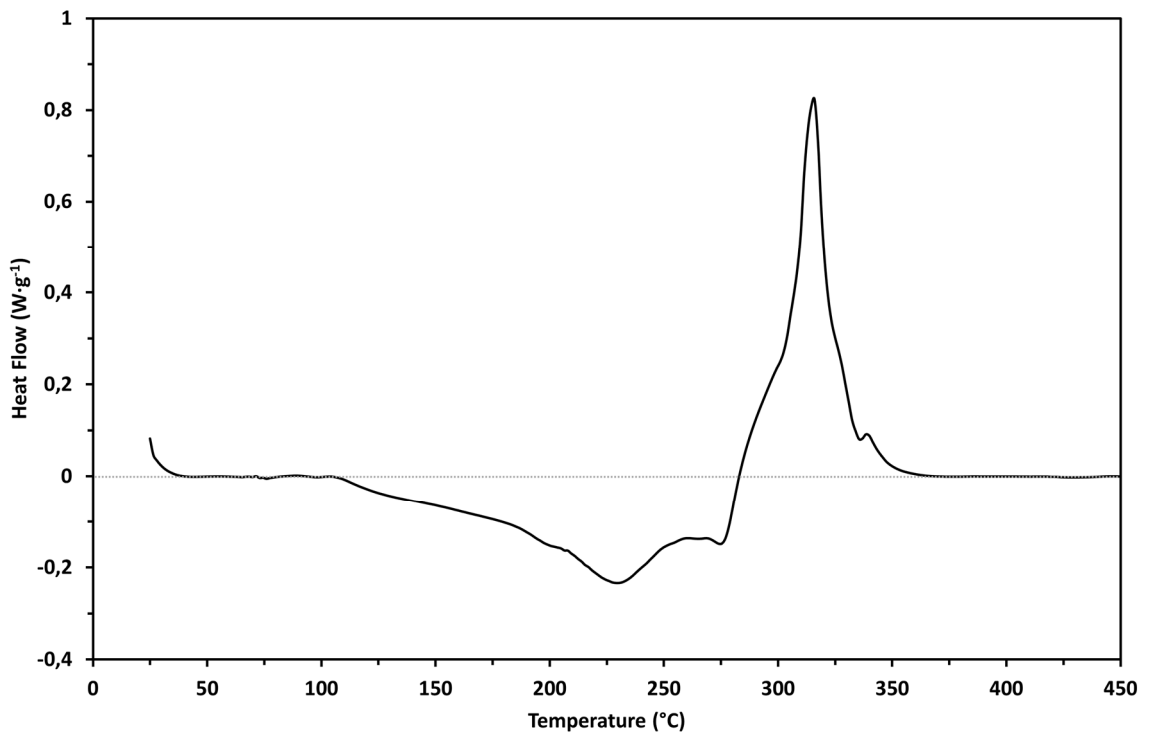

■ Fig. S8 DSC curve of the  $\text{Eu}(\text{O}_2\text{CC}_2\text{F}_5)_2$ -containing substance (precursor for **3**).

## 4 Spectroscopy

### 4.1 IR and Raman spectra

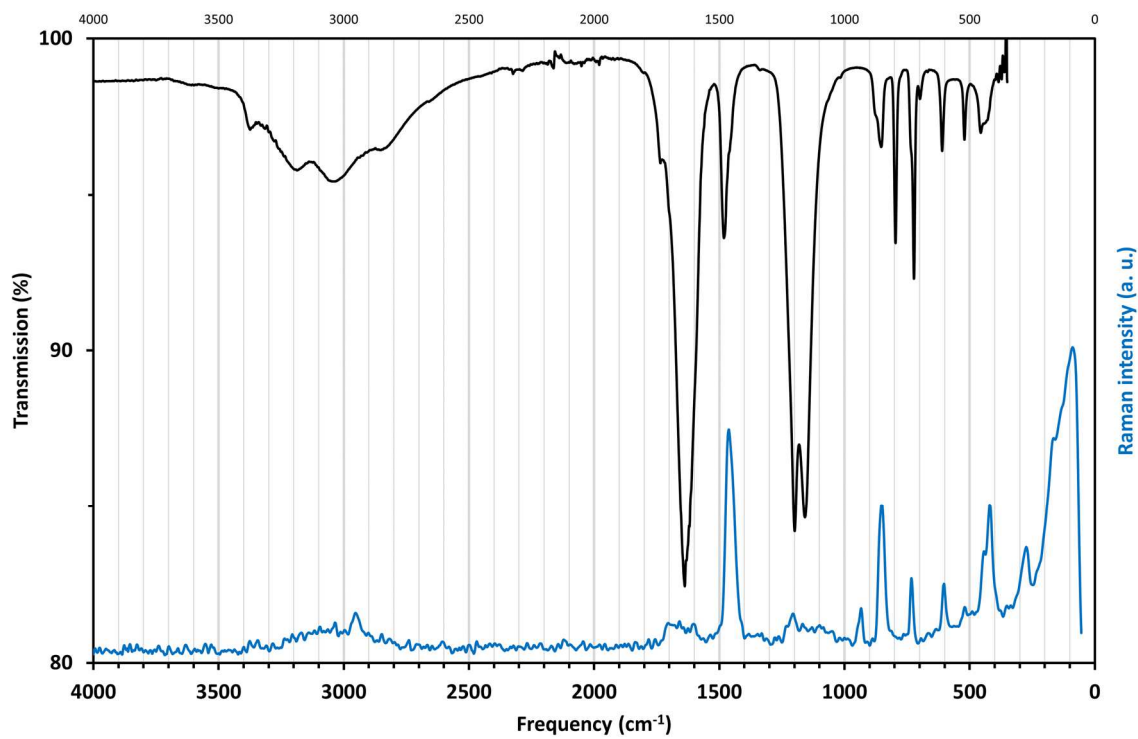

■ Fig. S9 IR and Raman spectra of the Eu(O<sub>2</sub>CCF<sub>3</sub>)<sub>2</sub>-containing substance (precursor for **1** and **2**).

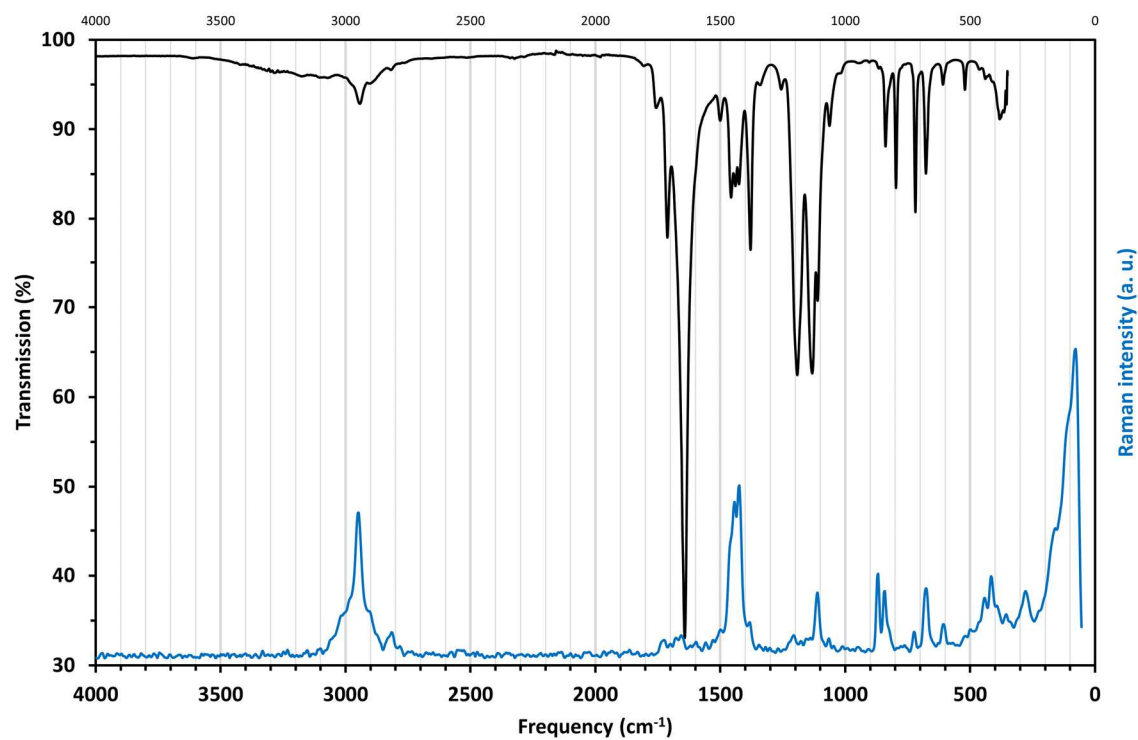

■ Fig. S10 IR and Raman spectra of **1**, [Eu(O<sub>2</sub>CCF<sub>3</sub>)<sub>2</sub>(dmf)<sub>2</sub>]<sub>∞</sub>.

## IR and Raman spectra (continued)

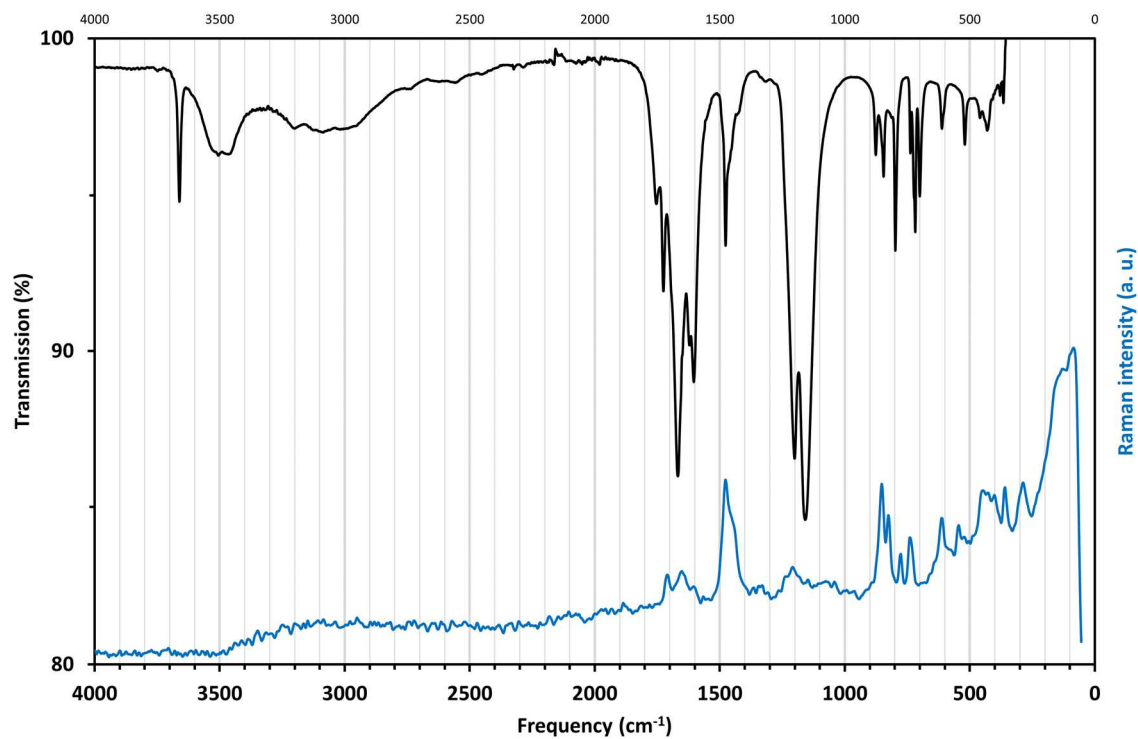

■ Fig. S11 IR and Raman spectra of **2**,  $(\text{NH}_4)_2[\text{Eu}_6\text{F}_8(\text{O}_2\text{CCF}_3)_{12}(\text{CF}_3\text{COOH})_6]$ .

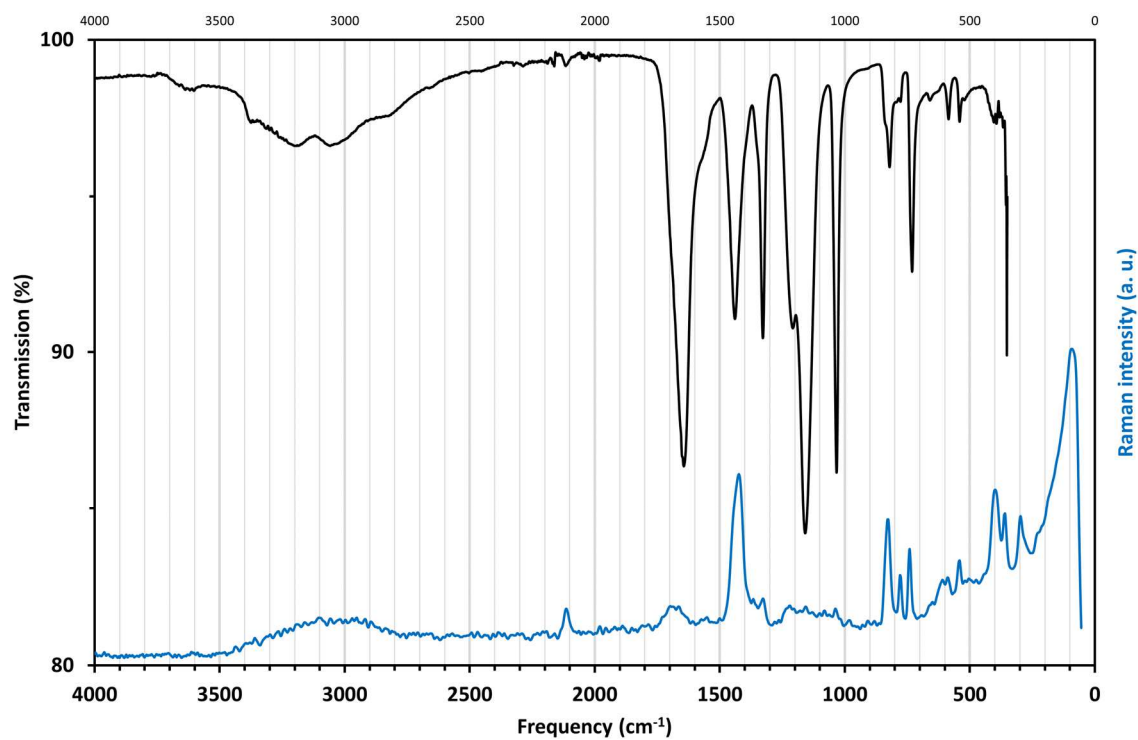

■ Fig. S12 IR and Raman spectra of the  $\text{Eu}(\text{O}_2\text{CC}_2\text{F}_5)_2$ -containing substance (precursor for **3**).

## IR and Raman spectra (continued)

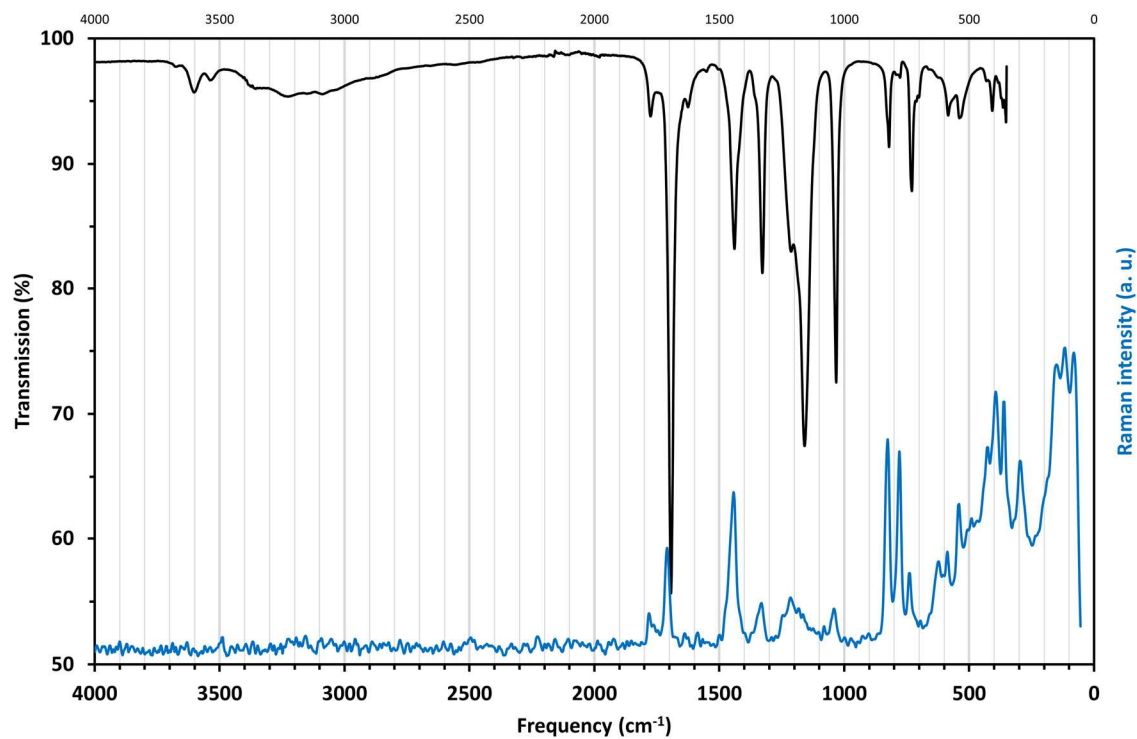

■ Fig. S13 IR and Raman spectra of **3**,  $(\text{NH}_4)_2[\text{Eu}_6\text{F}_8(\text{O}_2\text{CC}_2\text{F}_5)_{12}(\text{C}_2\text{F}_5\text{COOH})_6] \cdot 8\text{C}_2\text{F}_5\text{COOH}$ .

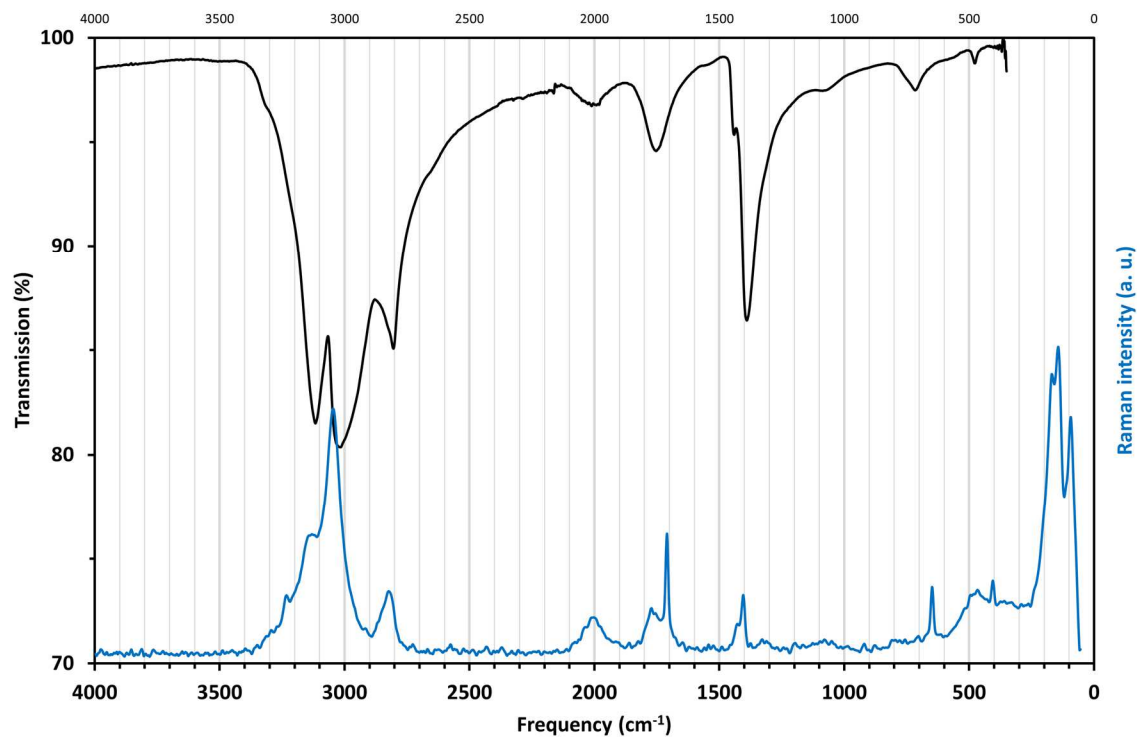

■ Fig. S14 IR and Raman spectra of ammonium fluoride,  $\text{NH}_4\text{F}$ .

IR and Raman spectra (continued)

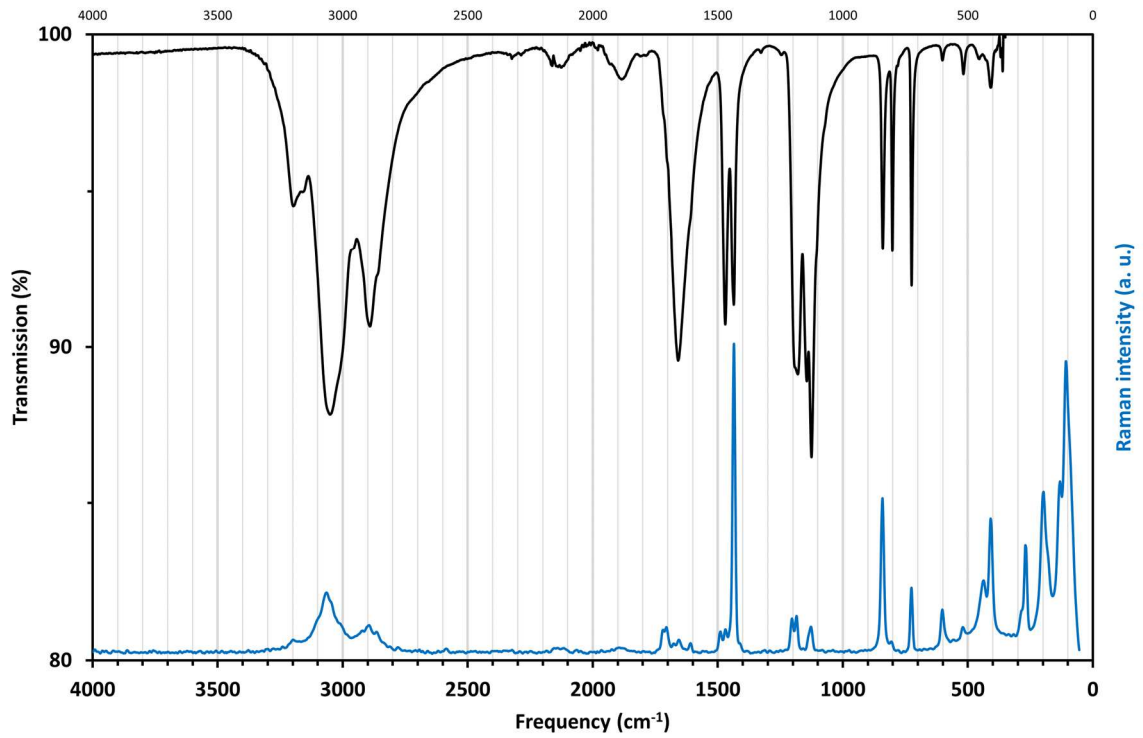

■ Fig. S15 IR and Raman spectra of ammonium trifluoroacetate,  $\text{NH}_4\text{O}_2\text{CCF}_3$ .

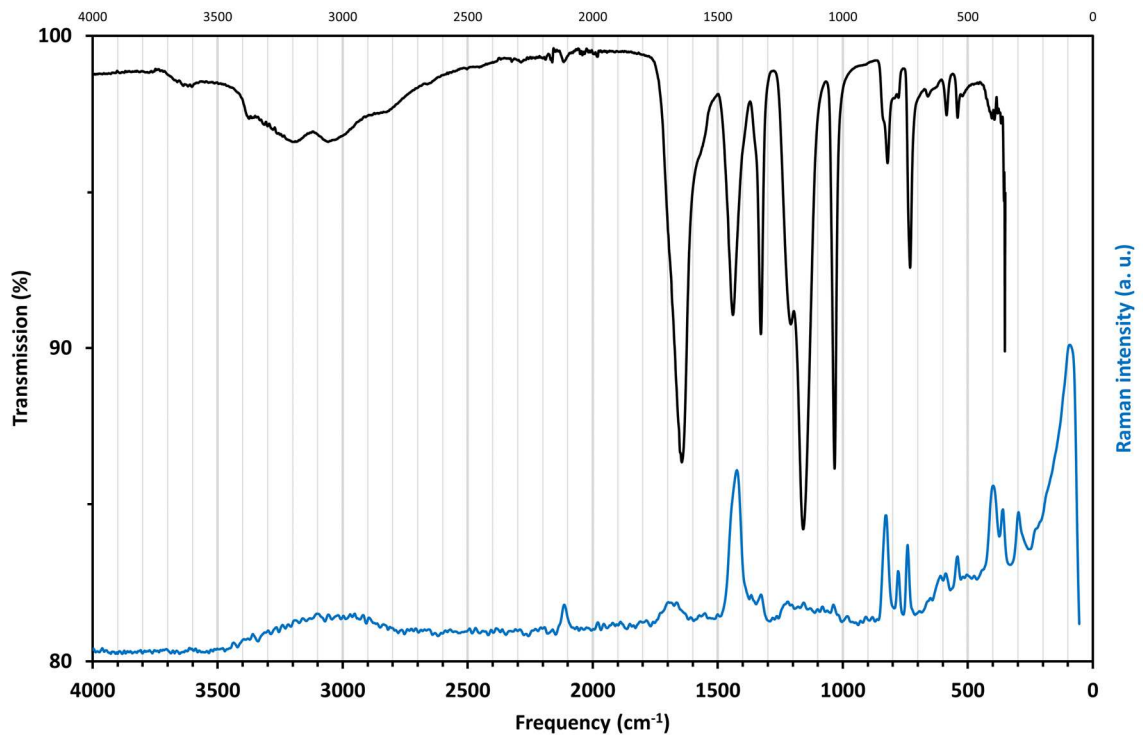

■ Fig. S16 IR and Raman spectra of ammonium pentafluoropropionate,  $\text{NH}_4\text{O}_2\text{CC}_2\text{F}_5$ .

4.2  $^{19}\text{F}$  NMR spectra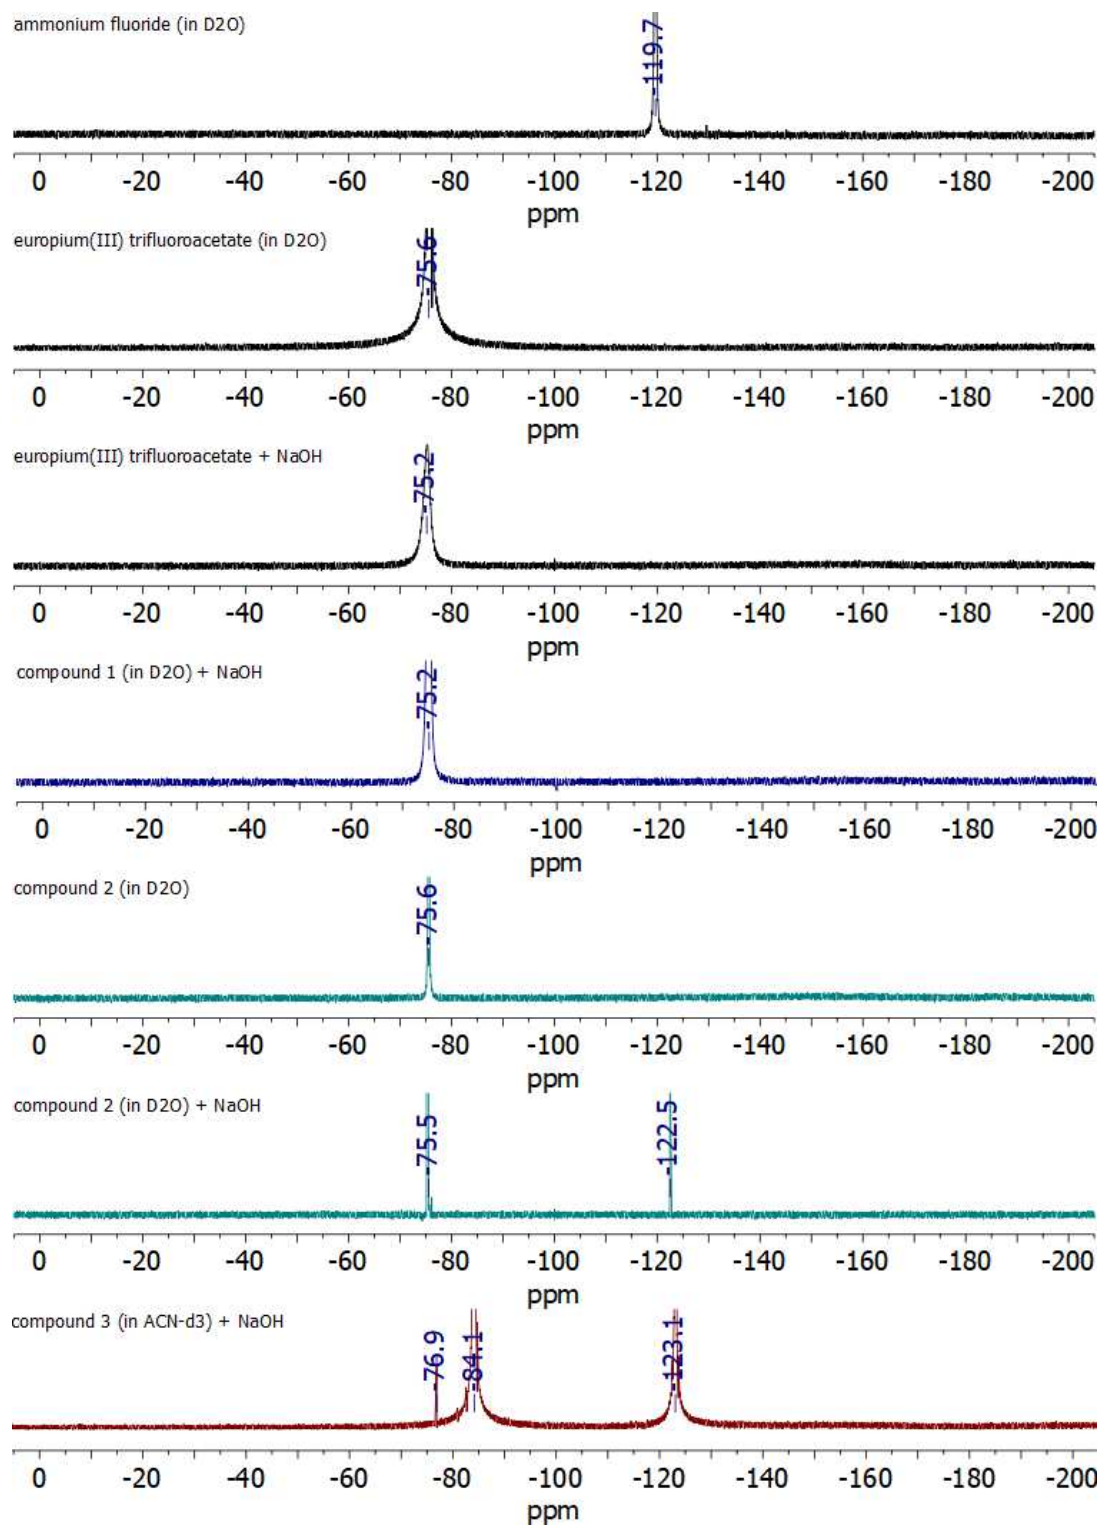

**Fig. S17**  $^{19}\text{F}$  NMR spectra of **1** and **2** (in D<sub>2</sub>O) and of **3** (in acetonitrile-d<sub>3</sub>). The chemical shift of free fluoride ions depends on the solvent and is about -123 ppm in deuterium oxide and about -77 ppm in acetonitrile.<sup>[4]</sup>

## 5 Packing diagrams and crystal morphology

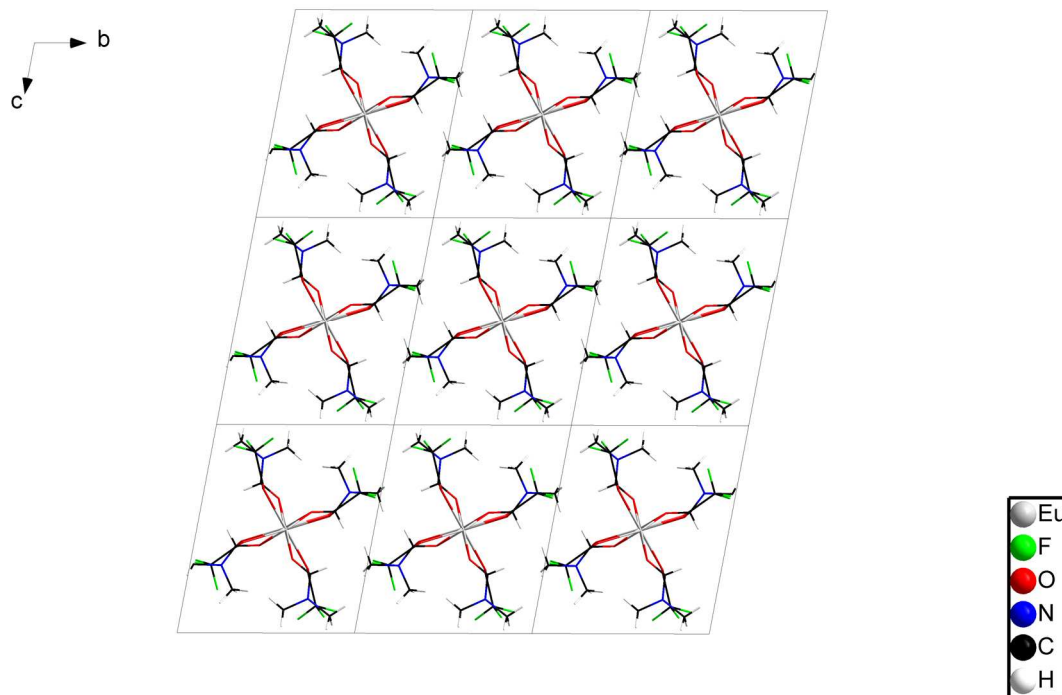

■ **Fig. S18** Packing diagram of **1**. Direction of view along the crystallographic *a*-axis [100].

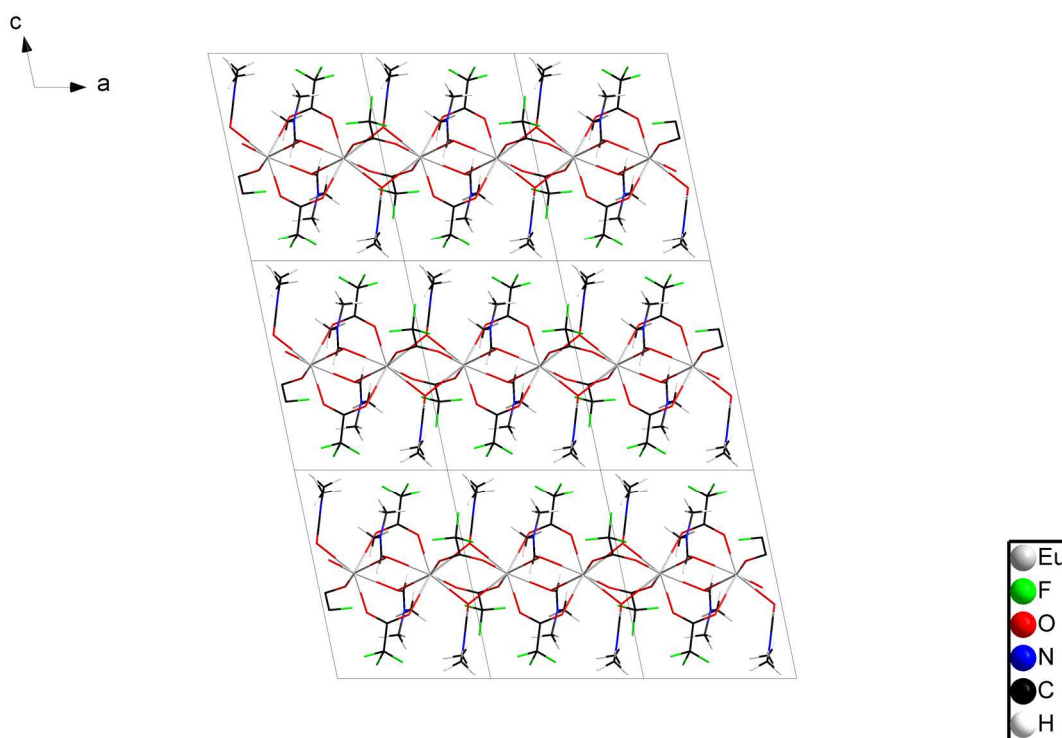

■ **Fig. S19** Packing diagram of **1**. Direction of view along the crystallographic *b*-axis [010].



## Packing diagrams (continued)

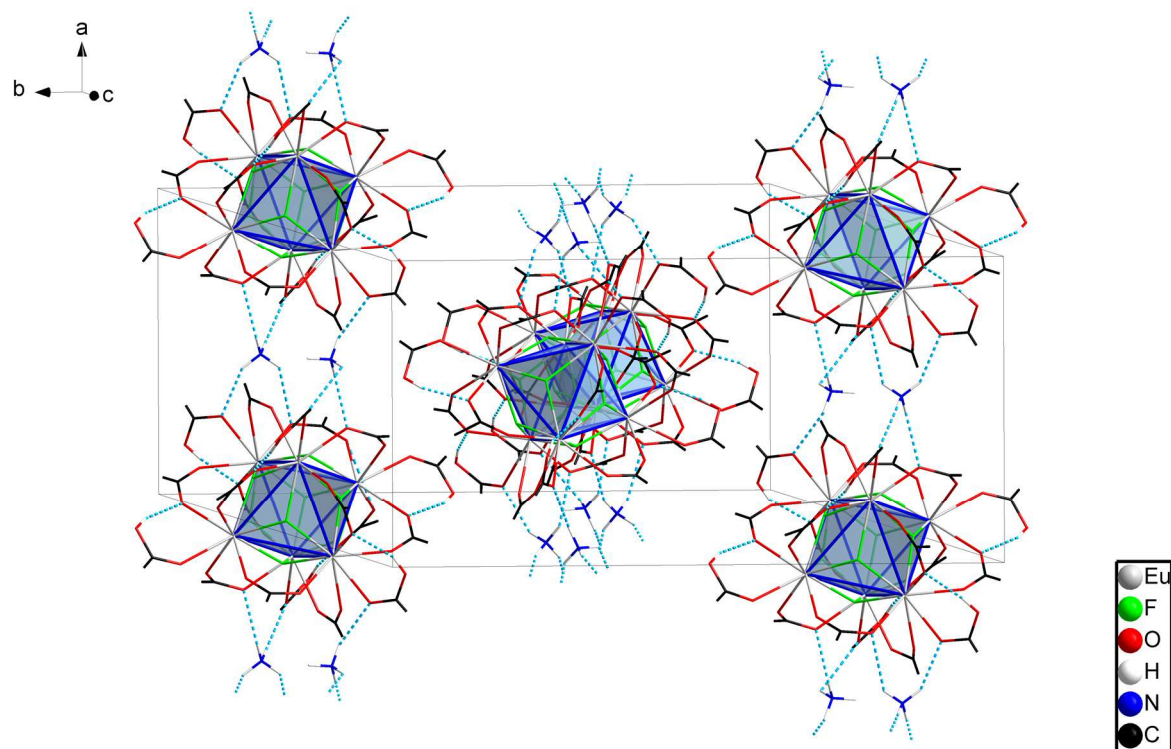

■ Fig. S20 Packing diagram of **2**. Note the connection of the complex ions along the crystallographic  $a$ -axis [100].

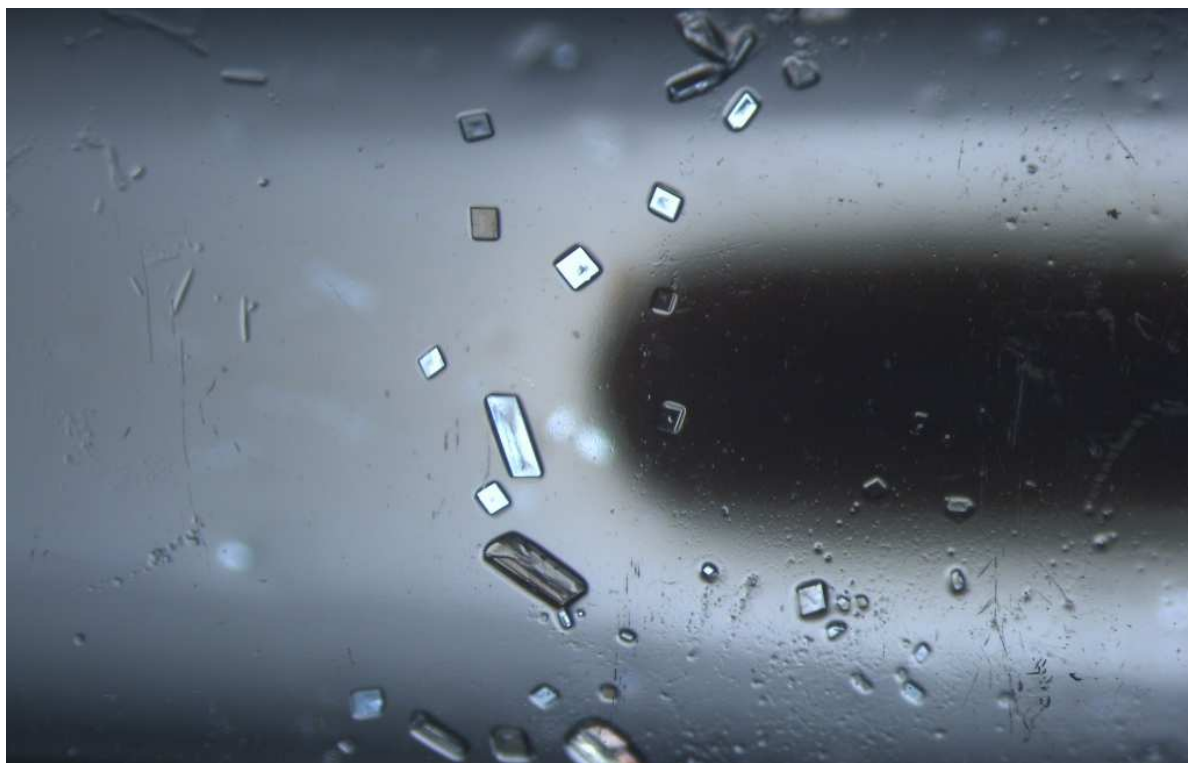

■ Fig. S21 Crystals of **2** (that are also representative for **3**) under a microscope in polarized light.

## References

- 1 I. D. Brown and D. Altermatt, *Acta Crystallogr.*, 1985, **B41**, 244-247.
- 2 A. Trześowska, R. Kruszyński and T. Bartczak, *Acta Crystallogr.*, 2006, **B62**, 745-753.
- 3 N. E. Brese and M. O'Keeffe, *Acta Crystallogr.*, 1991, **B47**, 192-197.
- 4 M. Gerken, J. A. Boatz, A. Kornath, R. Haiges, S. Schneider, T. Schroer and K. O. Christe, *J. Fluorine Chem.*, 2002, **116**, 49-58.
